# Supplementary material for: Developing energy-efficient N-doping technology to controllably construct N-Ru2P@Ru nanospheres for highly efficient hydrogen evolution at an ampere-level current density
Source: Royal Society of Chemistry journal article supplement (doi:10.1039/d3mh01007d), 2023-01-01
Supplement: d3mh01007d1.pdf [file d3mh01007d1.pdf]

## **Developing energy-efficient N-doping technology to controllably construct N-Ru<sub>2</sub>P@Ru nanospheres for high-efficient hydrogen evolution at an ampere-level current density**

Mengmeng Wang<sup>a</sup>, Yunmei Du<sup>\*a</sup>, Shuangshuang Li<sup>a</sup>, Xiaoli Sun<sup>b</sup>, Bin Li<sup>c</sup>, Yuanxiang Gu<sup>a</sup>, and Lei Wang<sup>\*ab</sup>

a. Shandong Engineering Research Center for Marine Environment Corrosion and Safety Protection, College of Environment and Safety Engineering, Qingdao University of Science and Technology, Qingdao 266042, P. R. China.

b. College of Chemistry and Molecular Engineering, Qingdao University of Science and Technology, Key Laboratory of Eco-chemical Engineering, Key Laboratory of Optic-electric Sensing and Analytical Chemistry of Life Science, Taishan Scholar Advantage and Characteristic Discipline Team of Eco Chemical Process and Technology, Qingdao 266042, P. R. China.

c. College of Materials Science and Engineering, Qingdao University of Science and Technology, Qingdao 266042, P. R. China.

\*E-mail: inorchemwl@126.com (Lei Wang), duyunmeiqust@163.com (Yunmei Du)

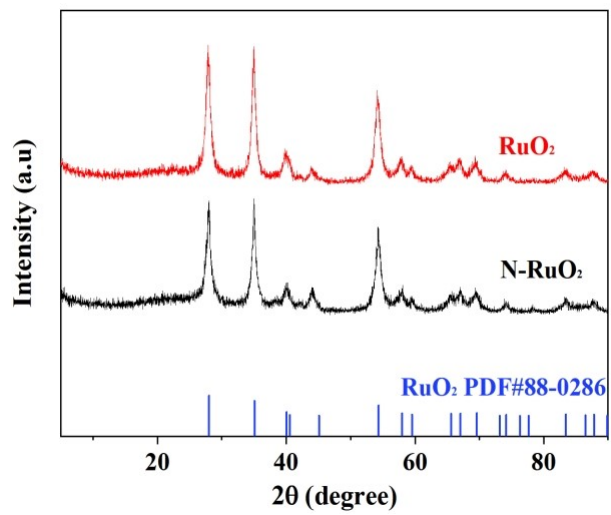

**Figure S1** XRD pattern of RuO<sub>2</sub> and N-RuO<sub>2</sub>.

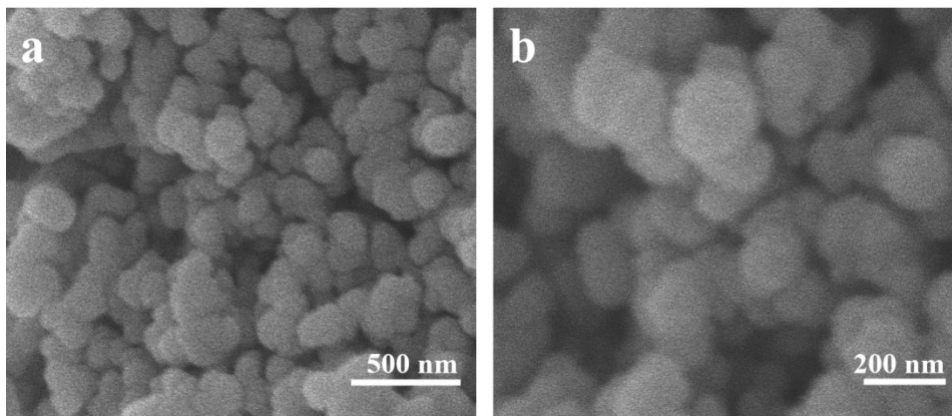

**Figure S2** SEM images of Ru<sub>2</sub>P@Ru.

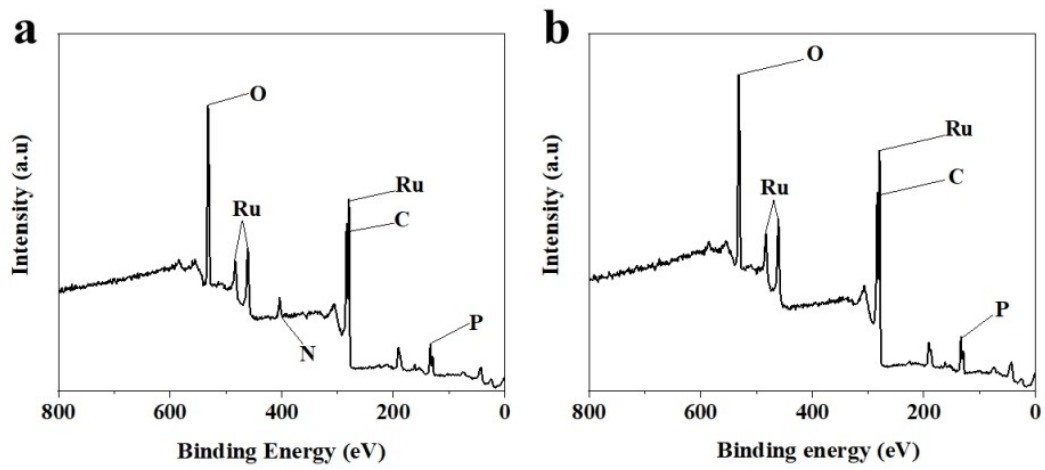

**Figure S3** XPS survey of N-Ru<sub>2</sub>P@Ru and Ru<sub>2</sub>P@Ru.

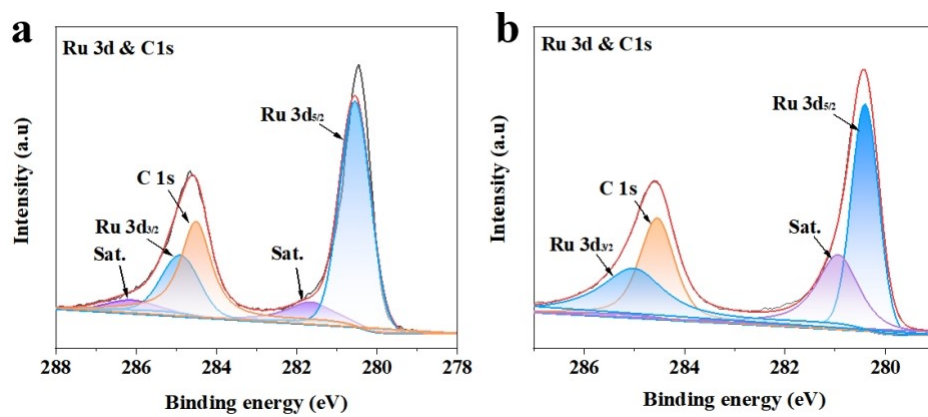

**Figure S4** High-resolution spectra of Ru 3d and C1s for N-Ru<sub>2</sub>P@Ru and Ru<sub>2</sub>P@Ru.

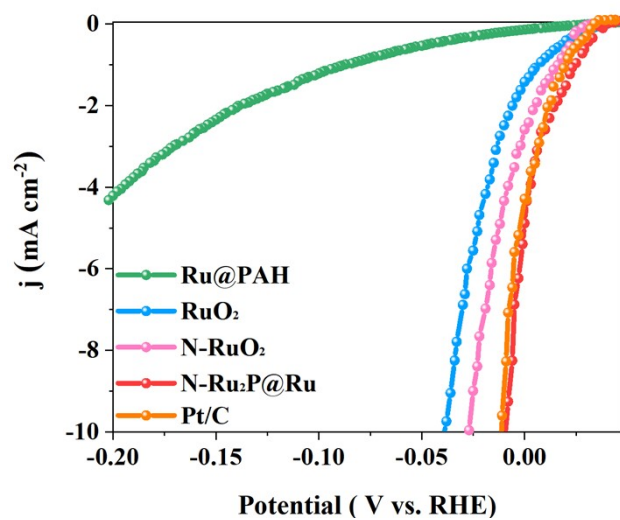

**Figure S5** LSV curves of Ru@PAH, RuO<sub>2</sub>, N-RuO<sub>2</sub>, N-Ru<sub>2</sub>P@Ru, and Pt/C in 1.0 M KOH.

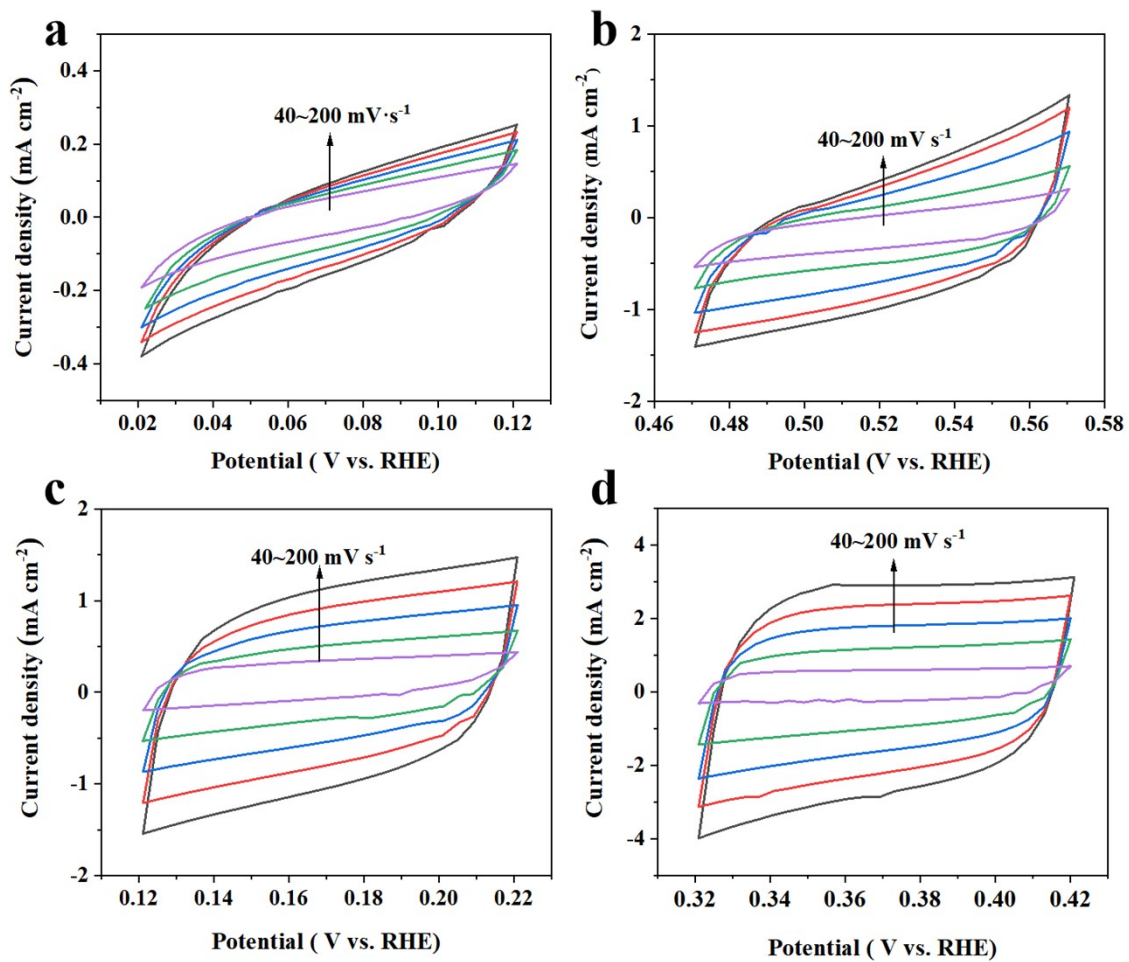

**Figure S6** CVs curves at different scan rates of HER in 1.0 M KOH. (a) Ru@PAH. (b) RuO<sub>2</sub>. (c) N-RuO<sub>2</sub>. (d) N-Ru<sub>2</sub>P@Ru.

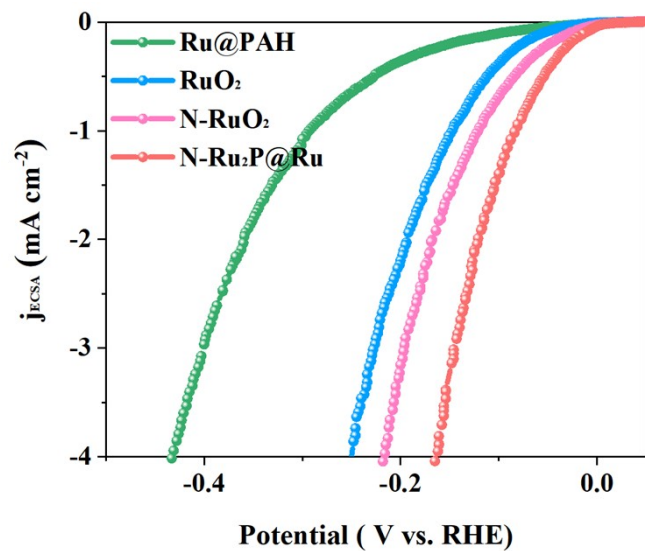

**Figure S7** The ECSA normalized polarization curve of HER.



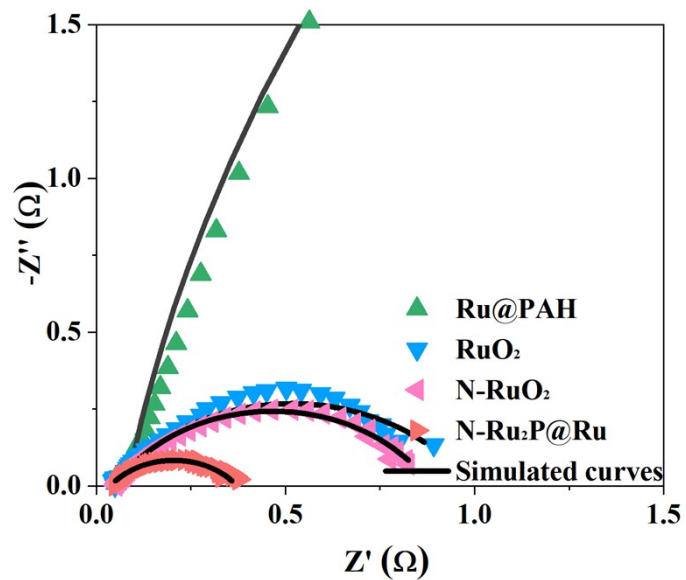

**Figure S8** EIS Nyquist plots of HER in 1.0 M KOH.

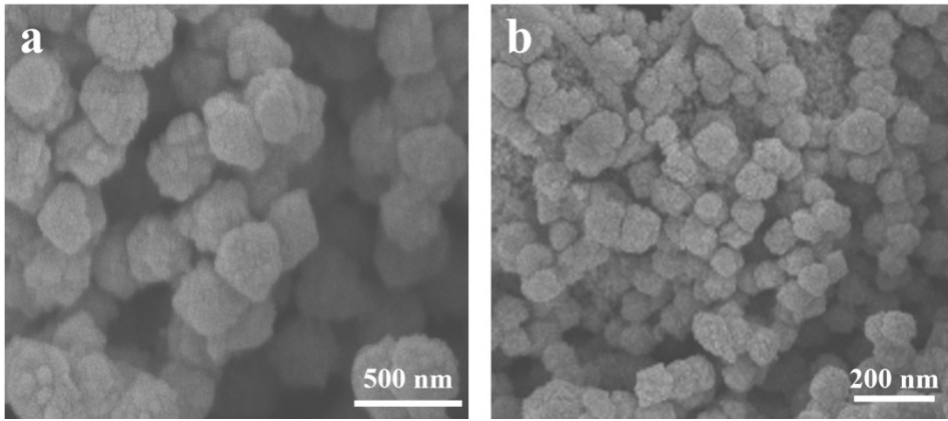

**Figure S9** SEM images of N-Ru<sub>2</sub>P@Ru after HER.

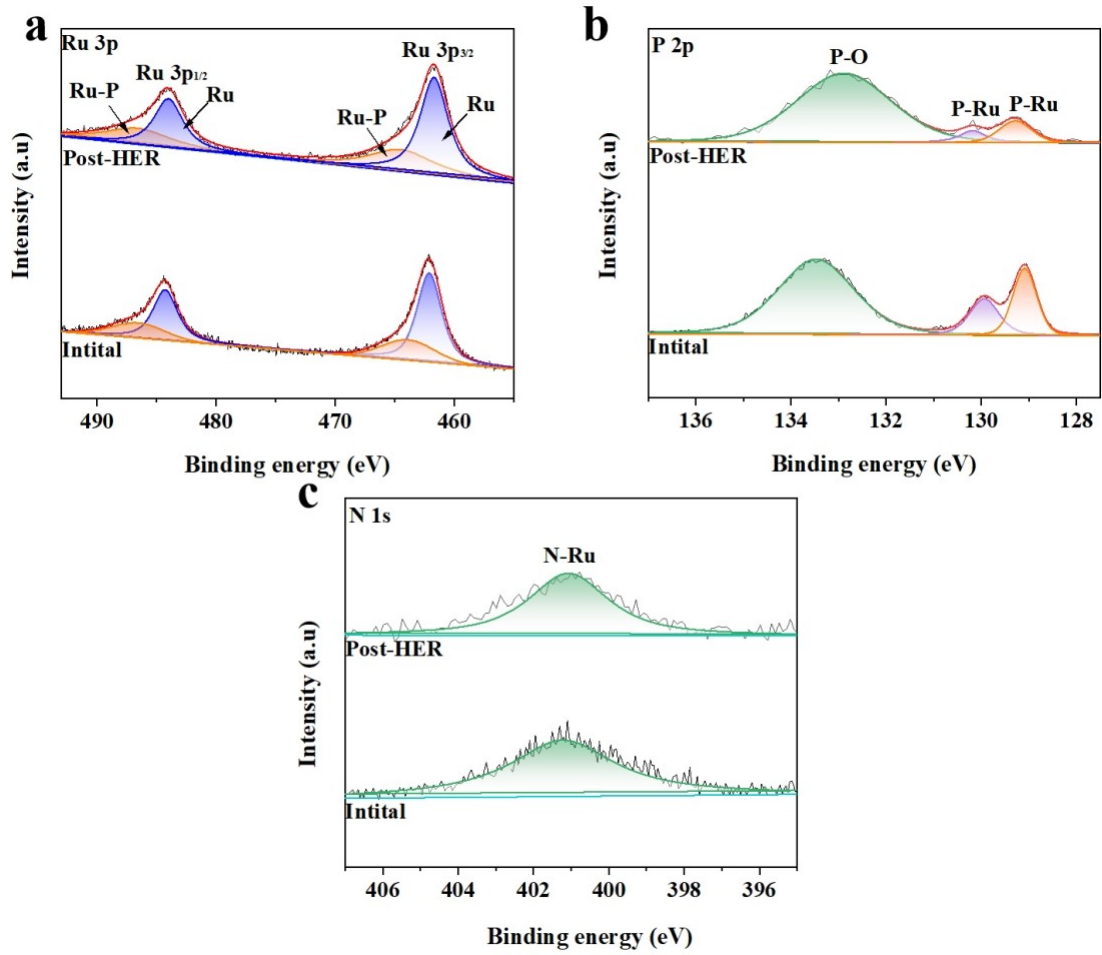

**Figure S10** XPS spectra of N-Ru<sub>2</sub>P@Ru after HER.

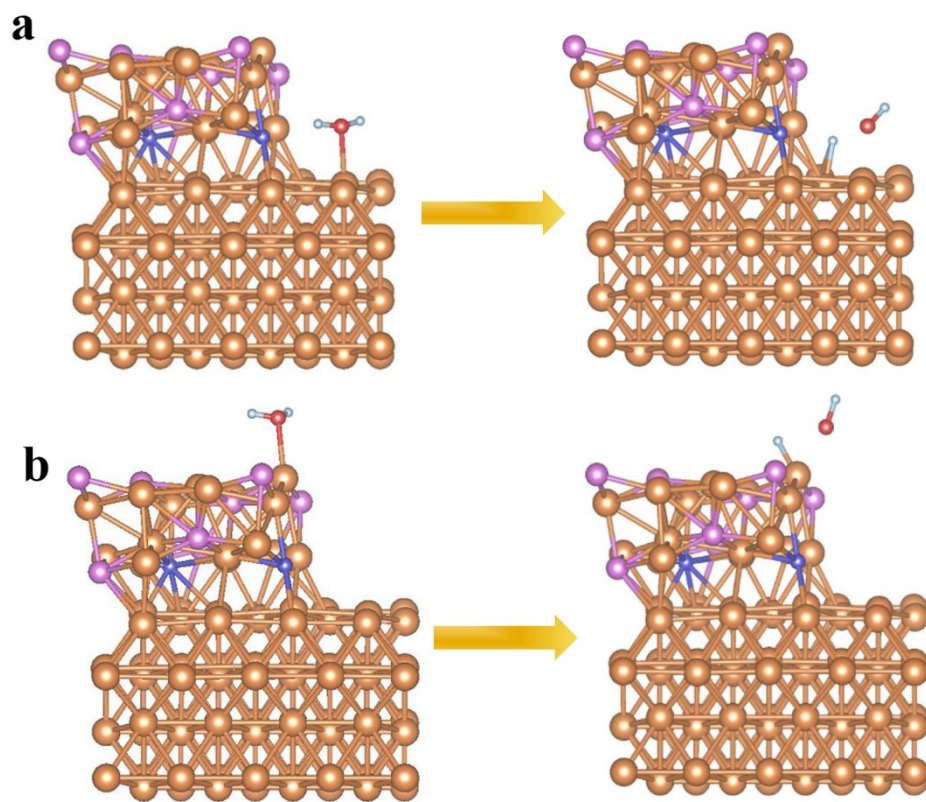

**Figure S11** The structures of \*H and \*OH on freestanding N-Ru<sub>2</sub>P@Ru heterointerface.

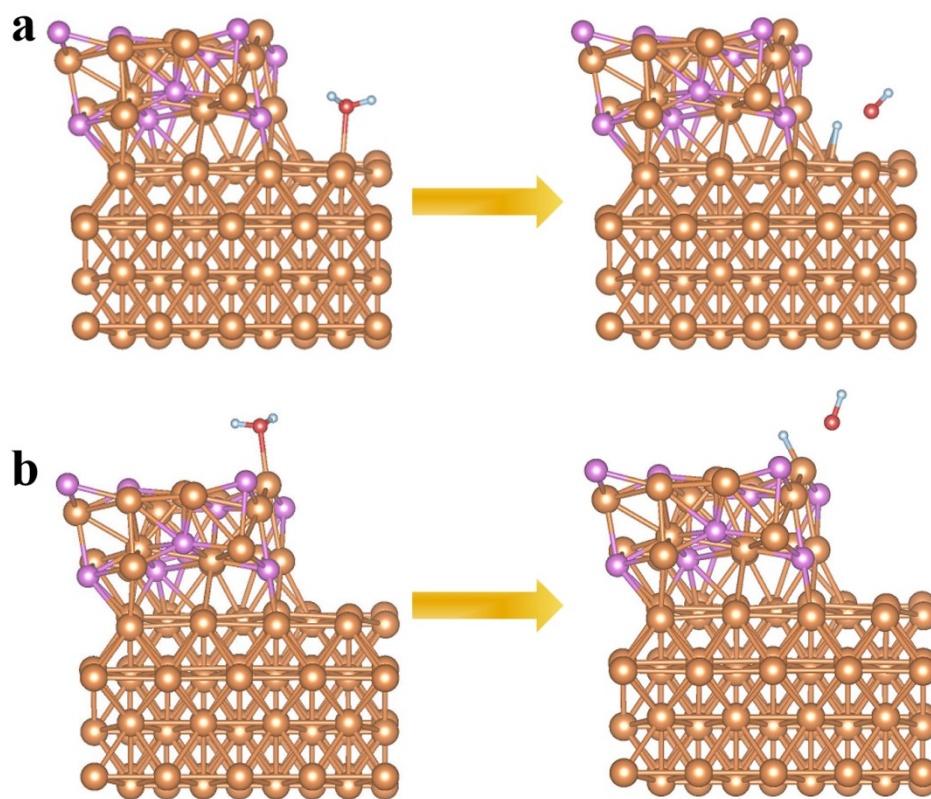

**Figure S12** The structures of \*H and \*OH on freestanding Ru<sub>2</sub>P@Ru heterointerface.

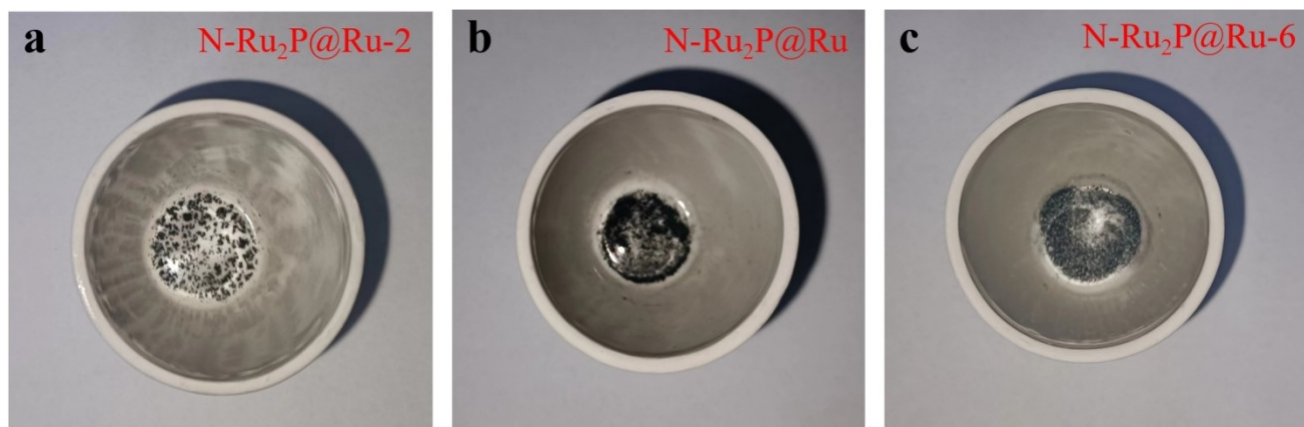

**Figure S13** Crucible state at ammoniation time of 2, 4, and 6, respectively.

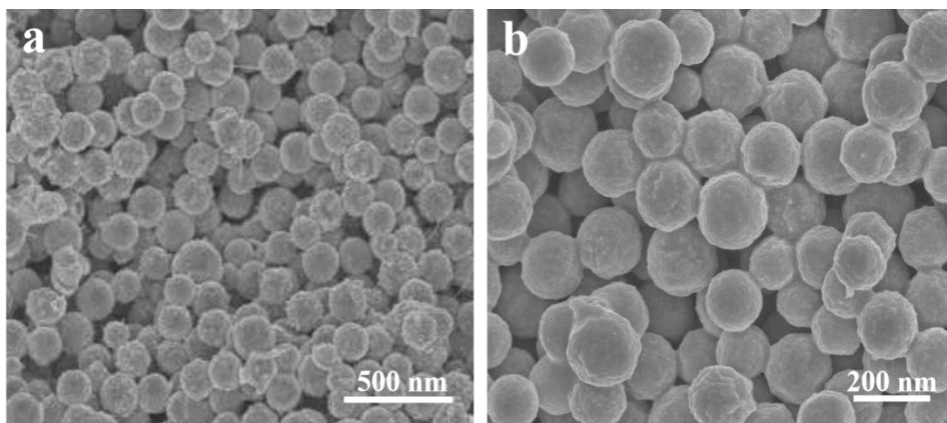

**Figure S14** SEM images of N-Ru<sub>2</sub>P@Ru-2.

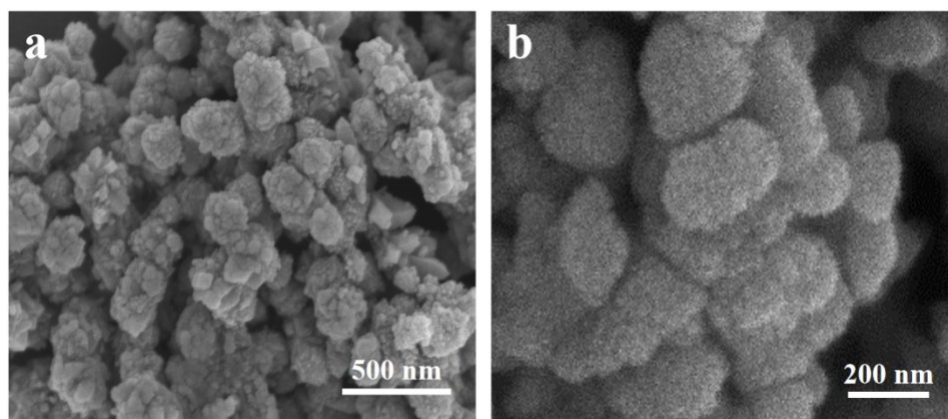

**Figure S15** SEM images of N-Ru<sub>2</sub>P@Ru-6.



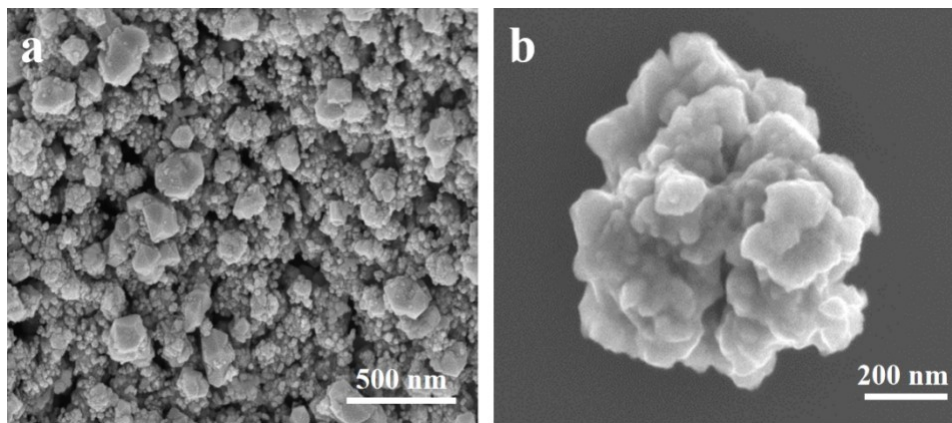

**Figure S16** SEM images of N-Ru<sub>2</sub>P@Ru-8.

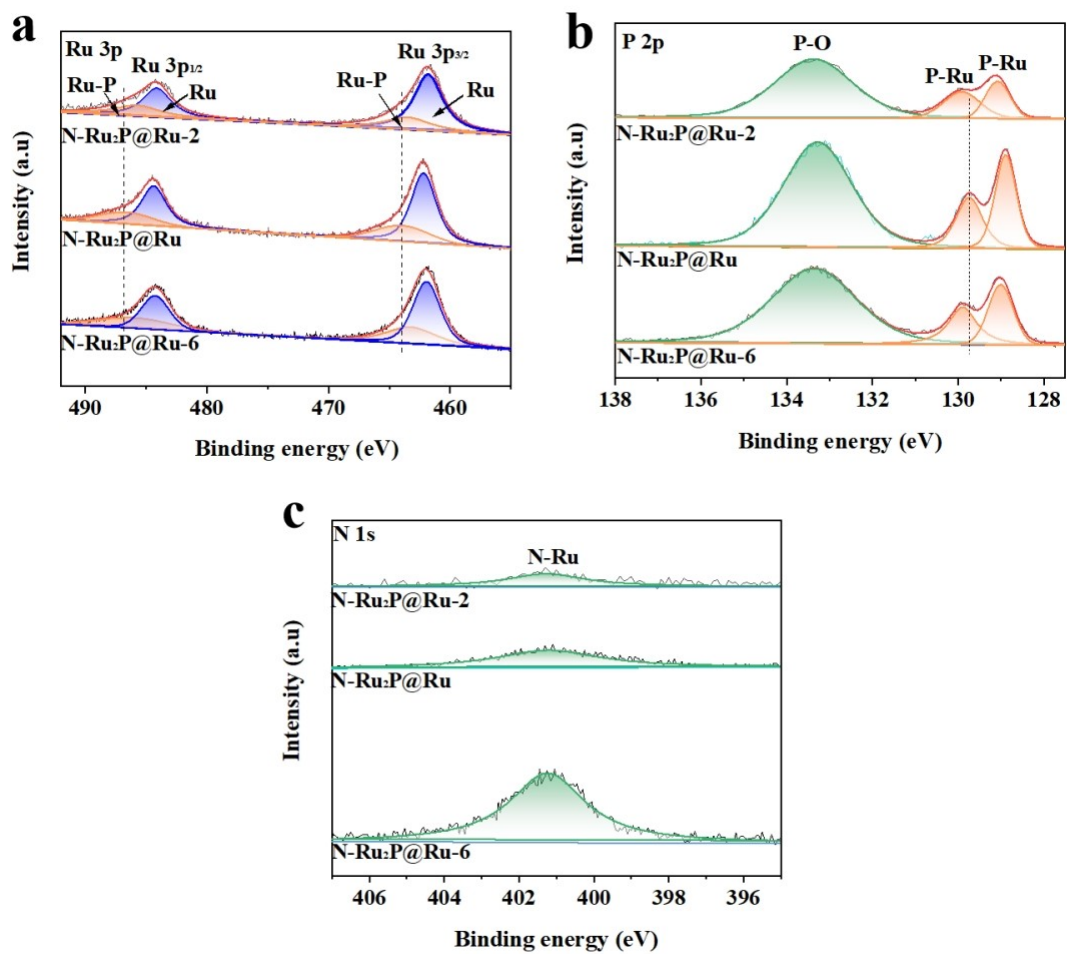

**Figure S17** XPS spectra of N-Ru<sub>2</sub>P@Ru-2, N-Ru<sub>2</sub>P@Ru, and N-Ru<sub>2</sub>P@Ru-6.

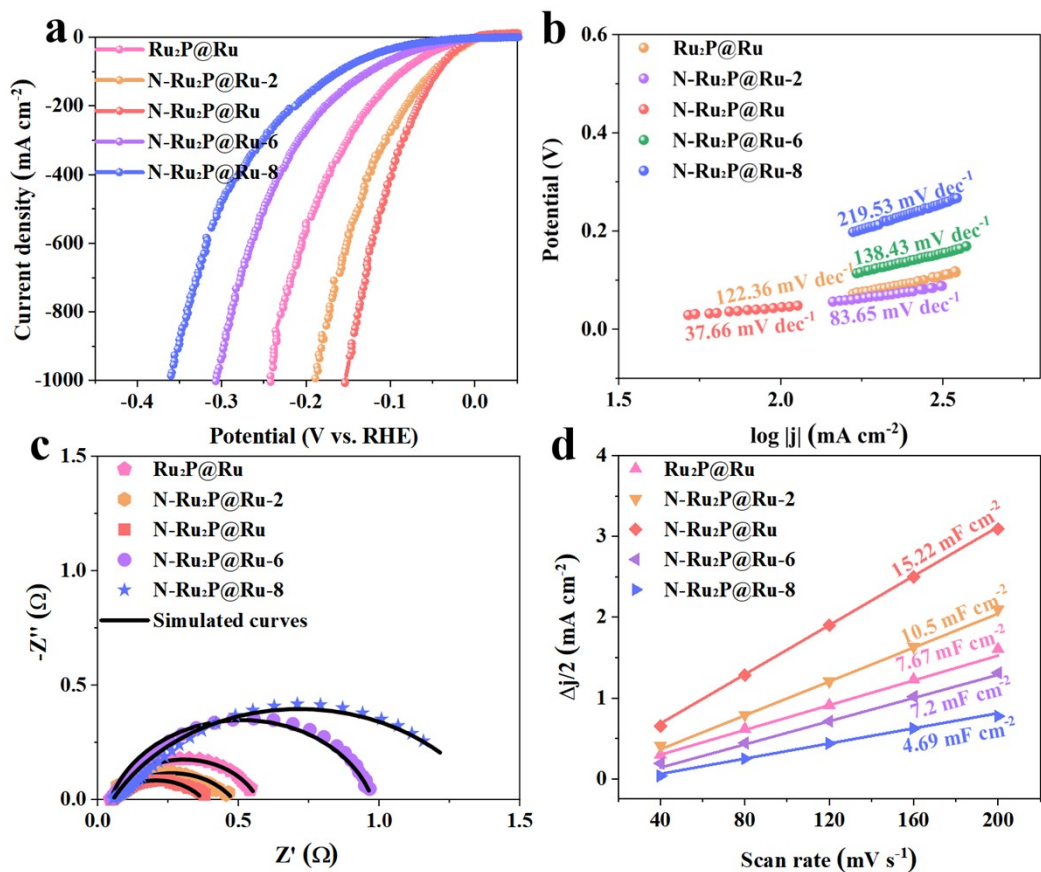

**Figure S18** HER properties of catalyst samples in 1.0 M KOH. (a) LSV curves. (b) Tafel slopes. (c) EIS charts. (d) ECSA plots of Ru<sub>2</sub>P@Ru, N-Ru<sub>2</sub>P@Ru-2, N-Ru<sub>2</sub>P@Ru, N-Ru<sub>2</sub>P@Ru-6, and N-Ru<sub>2</sub>P@Ru-8.

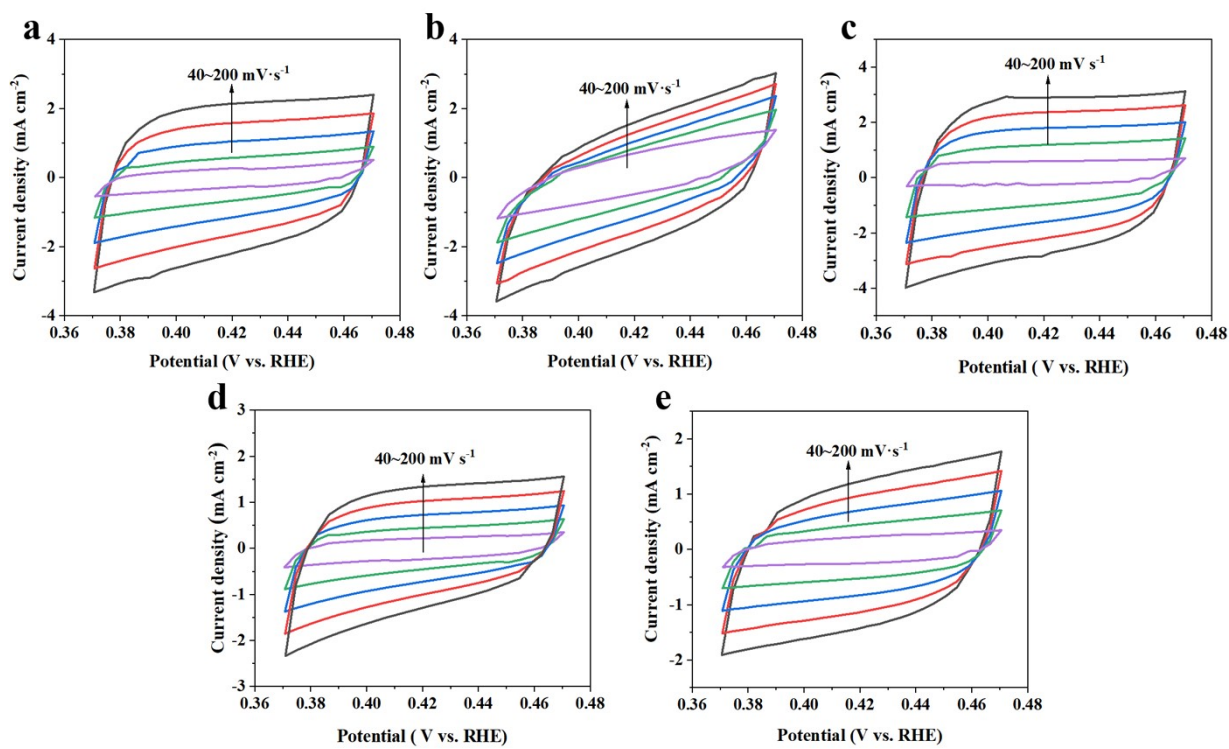

**Figure S19** CVs curves at different scan rates of HER in 1.0 M KOH. (a) Ru<sub>2</sub>P@Ru. (b) N-Ru<sub>2</sub>P@Ru-2. (c) N-Ru<sub>2</sub>P@Ru. (d) N-Ru<sub>2</sub>P@Ru-6. (e) N-Ru<sub>2</sub>P@Ru-8.

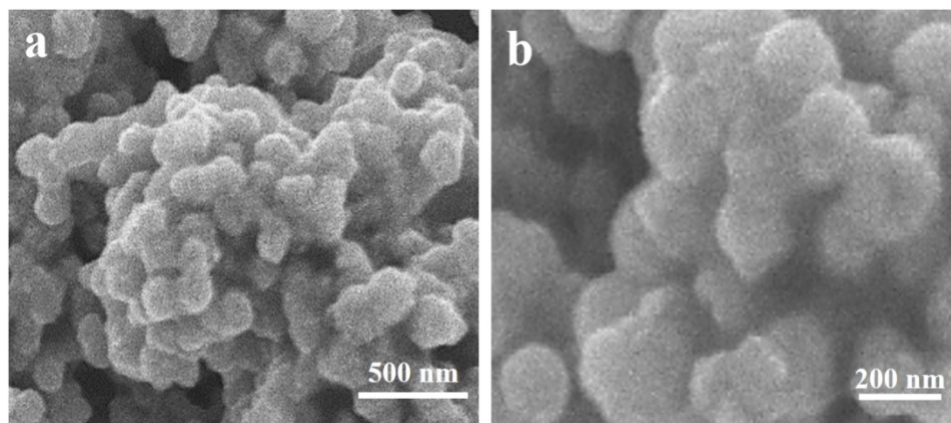

**Figure S20** SEM images of N-Ru<sub>2</sub>P@Ru-350.

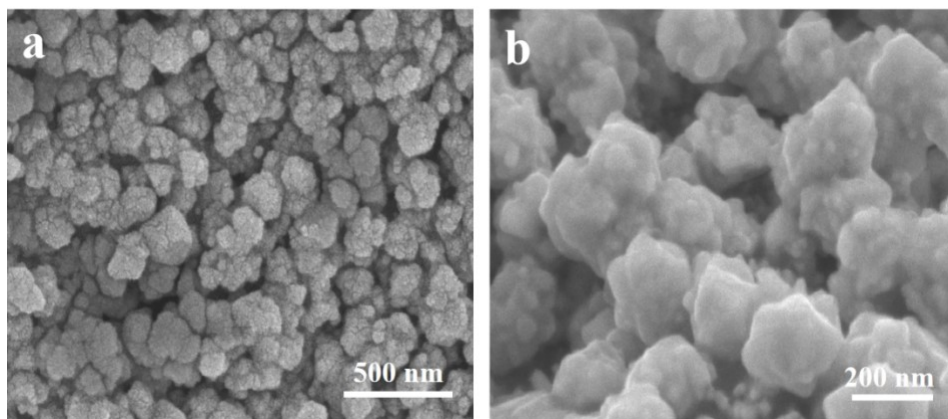

**Figure S21** SEM images of N-Ru<sub>2</sub>P@Ru-550.

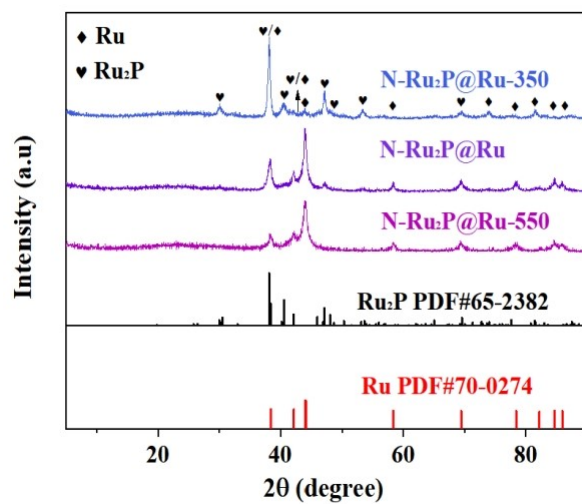

**Figure S22** XRD pattern of N-Ru<sub>2</sub>P@Ru-350, N-Ru<sub>2</sub>P@Ru, and N-Ru<sub>2</sub>P@Ru-550.

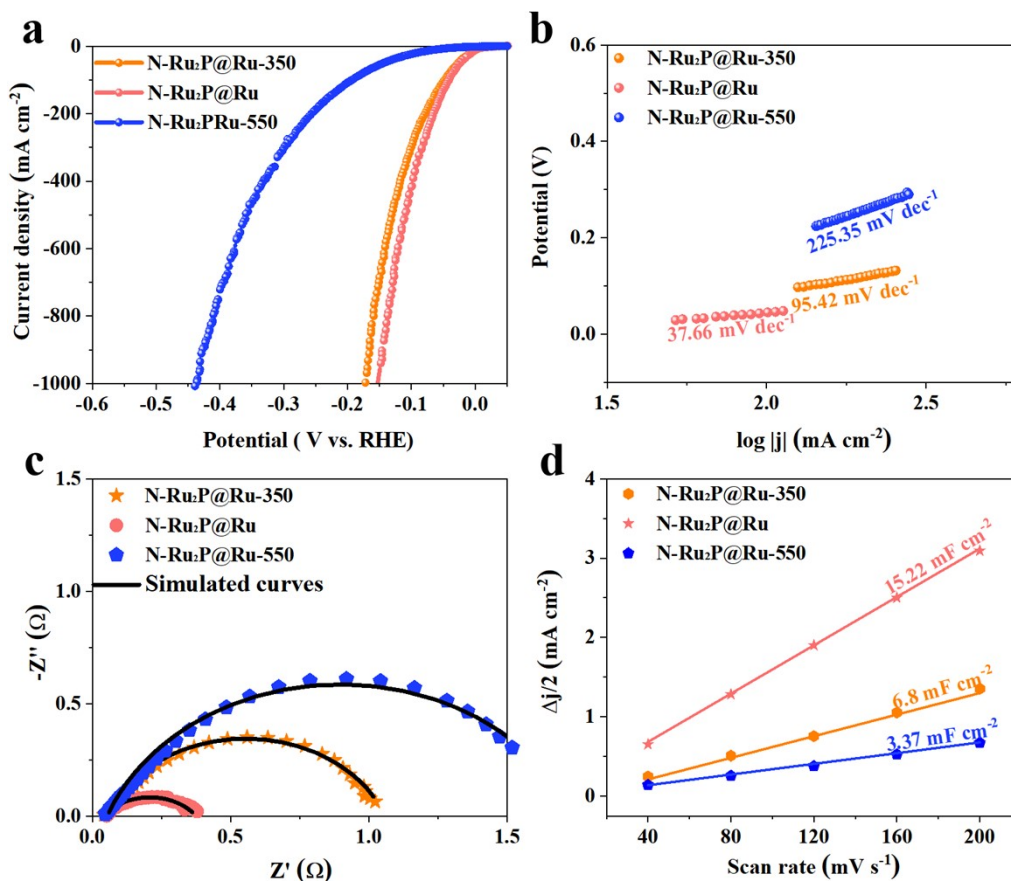

**Figure S23** HER properties of catalyst samples in 1.0 M KOH. (a) LSV curves. (b) Tafel slopes. (c) EIS charts.

(d) ECSA plots of N-Ru<sub>2</sub>P@Ru-350, N-Ru<sub>2</sub>P@Ru, and N-Ru<sub>2</sub>P@Ru-550.



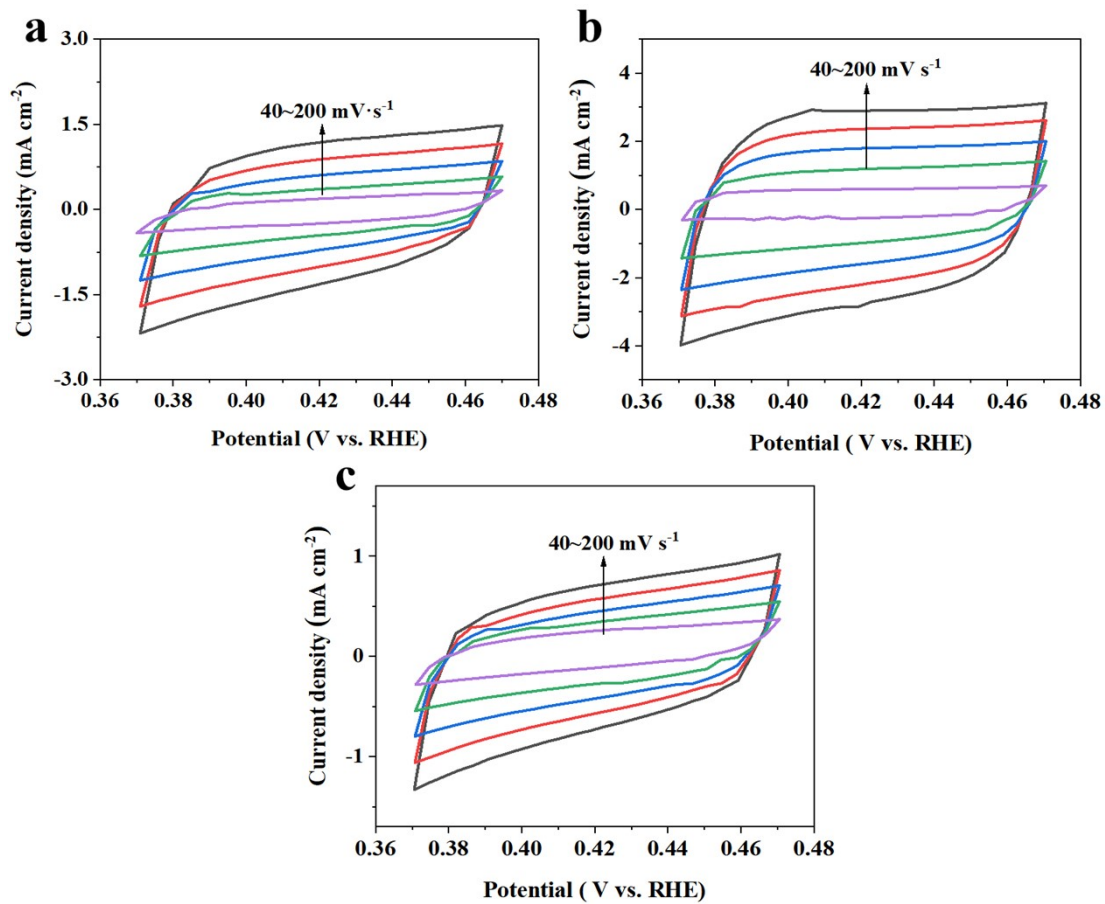

**Figure S24** CVs curves at different scan rates of HER in 1.0 M KOH. (a) N-Ru<sub>2</sub>P@Ru-350. (b) N-Ru<sub>2</sub>P@Ru. (c) N-Ru<sub>2</sub>P@Ru-550.

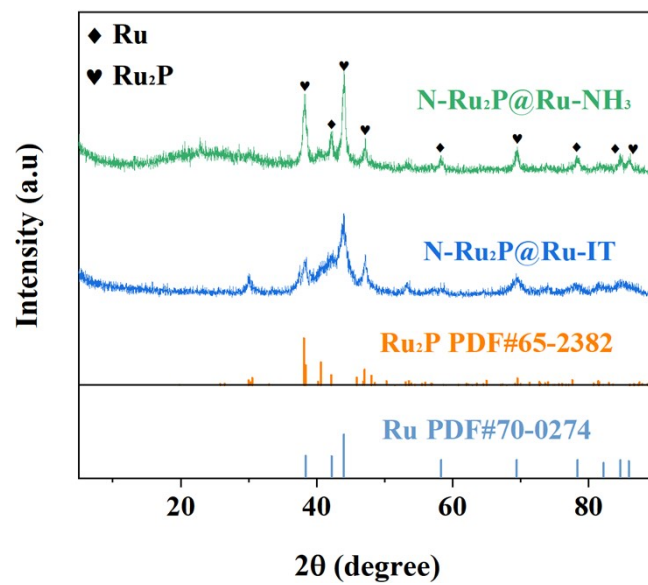

**Figure S25** XRD pattern of N-Ru<sub>2</sub>P@Ru-NH<sub>3</sub> and N-Ru<sub>2</sub>P@Ru-IT.

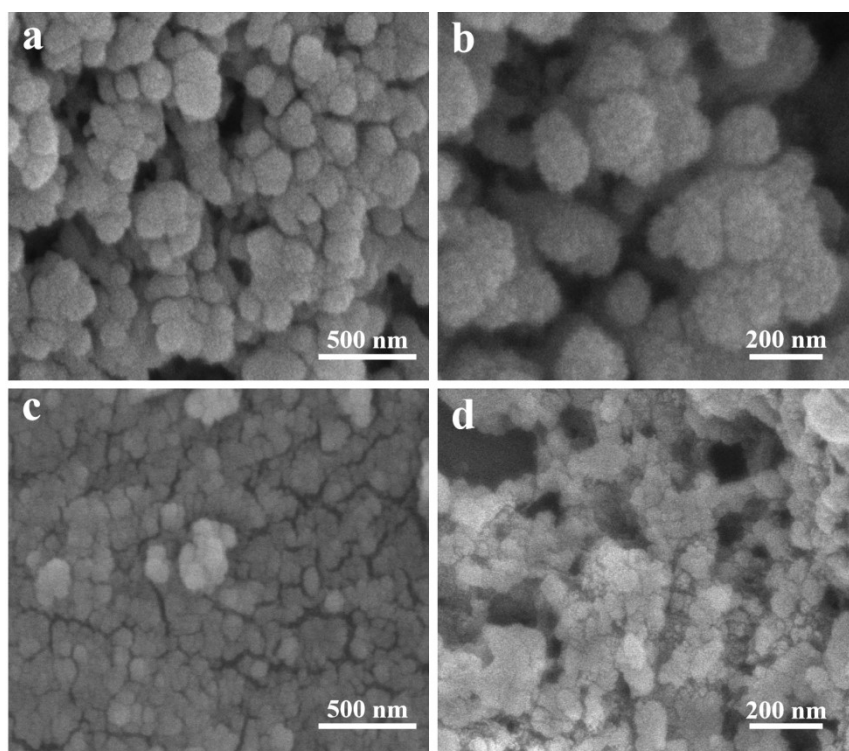

**Figure S26** SEM images of (a-b) N-Ru<sub>2</sub>P@Ru-IT and (c-d) N-Ru<sub>2</sub>P@Ru-NH<sub>3</sub>.

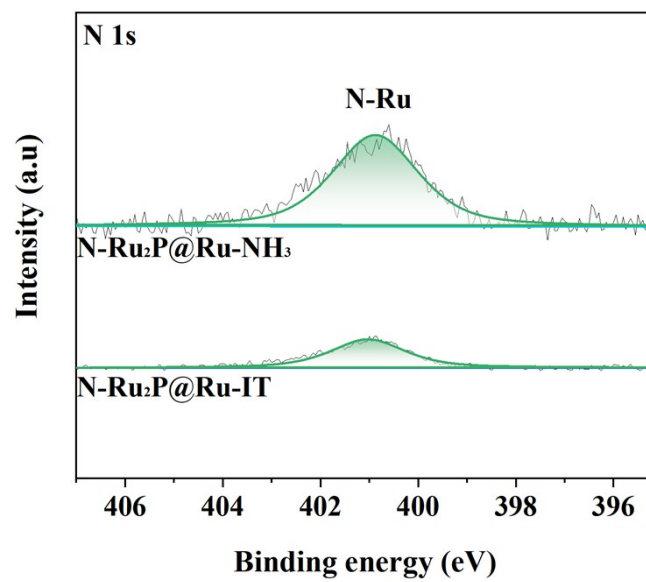

**Figure S27** XPS spectra of N 1s for N-Ru<sub>2</sub>P@Ru-NH<sub>3</sub> and N-Ru<sub>2</sub>P@Ru-IT.

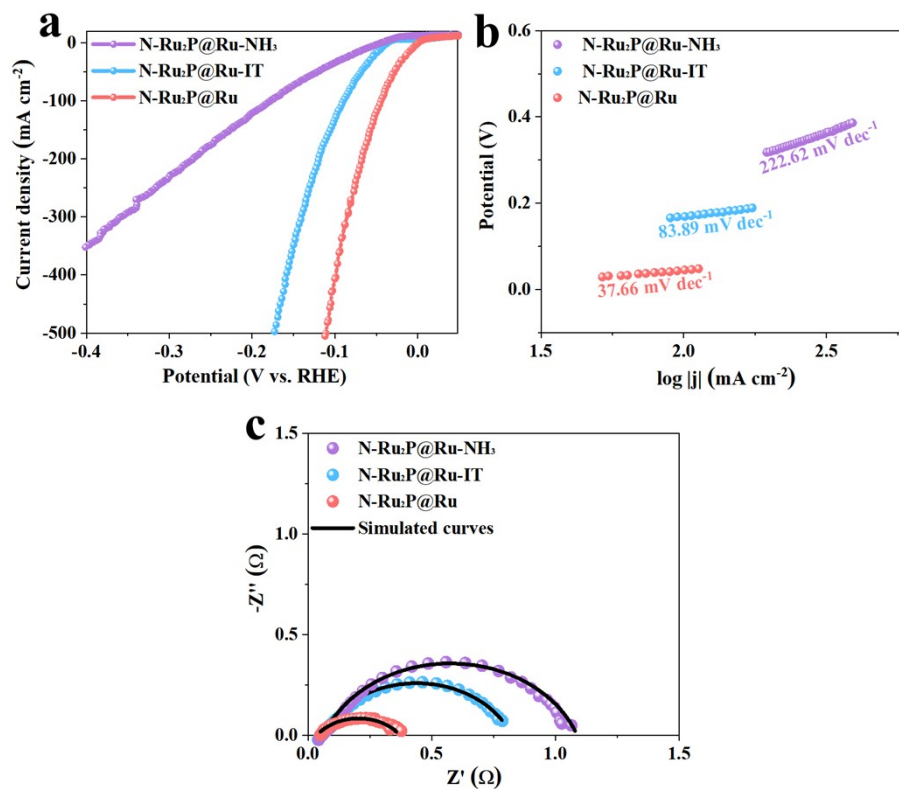

**Figure S28** HER properties of catalyst samples in 1.0 M KOH. (a) LSV curves. (b) Tafel slopes. (c) EIS charts of N-Ru<sub>2</sub>P@Ru-NH<sub>3</sub>, N-Ru<sub>2</sub>P@Ru-IT, and N-Ru<sub>2</sub>P@Ru.

**Table S1** Comparison of electrochemical surface area (ECSA) of N-Ru<sub>2</sub>P@Ru catalyst and other comparative samples for HER.

| Electrocatalysts       | C <sub>dl</sub> (mF cm <sup>-2</sup> ) | C <sub>DL</sub> (mF) | ECSA (cm <sup>-2</sup> ) |
|------------------------|----------------------------------------|----------------------|--------------------------|
| Ru@PAH                 | 0.47                                   | 0.47                 | 11.75                    |
| RuO <sub>2</sub>       | 7.18                                   | 7.18                 | 179.5                    |
| N-RuO <sub>2</sub>     | 7.22                                   | 7.22                 | 180.5                    |
| N-Ru <sub>2</sub> P@Ru | 11.98                                  | 11.98                | 299.5                    |

$C_{DL}=C_{dl}*S$ ;  $S=1*1 \text{ cm}^2$ ;  $ECSA=C_{DL}/C_s$ ;  $C_s=0.04 \text{ mF cm}^{-2}$ .

**Table S2** Internal resistance ( $R_{\Omega}$ ) and charge transfer resistance ( $R_{ct}$ ) of N-Ru<sub>2</sub>P@Ru catalyst and other comparative samples for HER

| <b>Electrocatalysts</b> | <b><math>R_{\Omega}(\Omega)</math></b> | <b><math>R_{ct}(\Omega)</math></b> |
|-------------------------|----------------------------------------|------------------------------------|
| Ru@PAH                  | 0.0629                                 | 51.4                               |
| RuO <sub>2</sub>        | 0.0567                                 | 0.822                              |
| N-RuO <sub>2</sub>      | 0.0561                                 | 0.779                              |
| N-Ru <sub>2</sub> P@Ru  | 0.0523                                 | 0.328                              |

**Table S3** The overpotential required for a noble metal-based electrocatalyst in an alkaline environment at 10 mA cm<sup>-2</sup> has recently been reported.

| Electrocatalysts                       | j (mA cm <sup>-2</sup> ) | $\eta$ (mV) | References |
|----------------------------------------|--------------------------|-------------|------------|
| N-Ru <sub>2</sub> P@Ru                 | 10                       | 9           | This work  |
| RuCo                                   | 10                       | 10          | [S1]       |
| Ru/Mo <sub>2</sub> C@NC                | 10                       | 13          | [S2]       |
| Ru <sub>1,n</sub> -NC                  | 10                       | 14.8        | [S3]       |
| Ru@MoO(S) <sub>3</sub>                 | 10                       | 15.26       | [S4]       |
| Ru/RuO <sub>2</sub>                    | 10                       | 20          | [S5]       |
| Ru@CDs                                 | 10                       | 22          | [S6]       |
| Ru-Cu-MoO <sub>2</sub>                 | 10                       | 23          | [S7]       |
| Ru <sub>2</sub> P@Ru/CNT               | 10                       | 23          | [S8]       |
| Ru NRs/TiN                             | 10                       | 25          | [S9]       |
| Ru@ $\beta$ -HATB/CC                   | 10                       | 25          | [S10]      |
| Ru <sub>2</sub> P                      | 10                       | 26          | [S11]      |
| Ru/RuO <sub>2</sub>                    | 10                       | 27          | [S12]      |
| Co <sub>1</sub> Ru@Ru/CN               | 10                       | 30          | [S13]      |
| RuO <sub>2</sub> -RuP <sub>2</sub> /Ru | 10                       | 33          | [S14]      |
| M-Co NPs@Ru<br>SAs/NC                  | 10                       | 34          | [S15]      |
| NiRu <sub>0.13</sub> -BDC              | 10                       | 34          | [S16]      |
| a-Ru@Co-DHC                            | 10                       | 40          | [S17]      |



**Table S4** Comparison of P, Ru and N contents in different electrocatalysts obtained from XPS tests.

| <b>Electrocatalysts</b>  | <b>P content (at%)</b> | <b>Ru content (at%)</b> | <b>N content (at%)</b> |
|--------------------------|------------------------|-------------------------|------------------------|
| Ru <sub>2</sub> P@Ru     | 13.57                  | 12.77                   | 0                      |
| N-Ru <sub>2</sub> P@Ru-2 | 10.11                  | 9.12                    | 0.54                   |
| N-Ru <sub>2</sub> P@Ru   | 20.16                  | 18.31                   | 2.42                   |
| N-Ru <sub>2</sub> P@Ru-6 | 17.86                  | 17.59                   | 9.28                   |

**Table S5** Internal resistance ( $R_{\Omega}$ ) and charge transfer resistance ( $R_{ct}$ ) of N-Ru<sub>2</sub>P@Ru catalyst and other comparative samples for HER

| <b>Electrocatalysts</b>  | <b><math>R_{\Omega}(\Omega)</math></b> | <b><math>R_{ct}(\Omega)</math></b> |
|--------------------------|----------------------------------------|------------------------------------|
| Ru <sub>2</sub> P@Ru     | 0.0593                                 | 0.524                              |
| N-Ru <sub>2</sub> P@Ru-2 | 0.0566                                 | 0.428                              |
| N-Ru <sub>2</sub> P@Ru   | 0.0523                                 | 0.328                              |
| N-Ru <sub>2</sub> P@Ru-6 | 0.054                                  | 0.924                              |
| N-Ru <sub>2</sub> P@Ru-8 | 0.0595                                 | 1.276                              |

**Table S6** Internal resistance ( $R_{\Omega}$ ) and charge transfer resistance ( $R_{ct}$ ) of N-Ru<sub>2</sub>P@Ru catalyst and other comparative samples for HER

| <b>Electrocatalysts</b>    | <b><math>R_{\Omega}(\Omega)</math></b> | <b><math>R_{ct}(\Omega)</math></b> |
|----------------------------|----------------------------------------|------------------------------------|
| N-Ru <sub>2</sub> P@Ru-350 | 0.0592                                 | 0.987                              |
| N-Ru <sub>2</sub> P@Ru     | 0.0523                                 | 0.328                              |
| N-Ru <sub>2</sub> P@Ru-550 | 0.064                                  | 1.645                              |

**Table S7** Nitrogen content in different electrocatalysts obtained from XPS tests.

| <b>Electrocatalysts</b>                | <b>N content (at%)</b> |
|----------------------------------------|------------------------|
| N-Ru <sub>2</sub> P@Ru-NH <sub>3</sub> | 6.18                   |
| N-Ru <sub>2</sub> P@Ru                 | 2.42                   |
| N-Ru <sub>2</sub> P@Ru-IT              | 1.02                   |

- [S1] C. Cai, K. Liu, Y. M. Zhu, P. C. Li, Q. Y. Wang, B. Liu, S. Y. Chen, H. J. W. Li, L. Zhu, H. M. Li, J. W. Fu, Y. Chen, E. Pensa, J. H. Hu, Y. R. Lu, T. S. Chan, E. Cortés and M. Liu., *Angew. Chem. Int. Ed.*, 2022, **134**, e202113664.
- [S2] A. Salah, H. D. Ren, N. Al-Ansi, F. Y. Yu, Z. L. Lang, H. Tan and Y. G. Li, *J. Mater. Chem. A*, 2021, **9**, 20518-20529.
- [S3] Q. He, Y. Z. Zhou, H. W. Shou, X. Y. Wang, P. J. Zhang, W. J. Xu, S. C. Qiao, C. Q. Wu, H. J. Liu, D. B. Liu, S. M. Chen, R. Long, Z. M. Qi, X. J. Wu and L. Song, *Adv. Mater.*, 2022, **34**, 2110604.
- [S4] D. Chen , R. H. Yu , D. L. Wu , H. L. Zhao , P. Y. Wang , J. W. Zhu , P. X. Ji , Z. H. Pu , L. Chen , J. Yu and S. C. Mu, *Nano Energy*, 2022, **100**, 107445.
- [S5] T. Zhang, G. M. Ren, D. Y. Li, Q. Y. Kong, Z. W. Hu, Y. Xu, S. L. Wang, L. Wang, M. F. Cao and X. Q. Huang, *Sci. Bull.*, 2022, **67**, 2103-2111.
- [S6] Z. L. Liu, B. Q. Li, Y. J. Feng, D. C. Jia, C. C. Li and Y. Zhou, *Small*, 2021, **17**, 2102496.
- [S7] Q. Liu, C. T. Zhang, P. Y. Wang, D. Chen, M. J. Xiao, L. Chen, S. L. Liu, J. Yu and S. C. Mu, *J. Mater. Chem. A*, 2022, **10**, 12341-12349.
- [S8] D. Zhang, H. F. Miao, X. K. Wu, Z. C. Wang, H. Zhao, Y. Shi, X. L. Chen, Z. Y. Xiao, J. Q. Lai and L. Wang, *Chin. J. Catal.*, 2022, **43**, 1148-1155.
- [S9] Y. J. Yang, D. X. Wu, R. S. Li, P. Rao, J. Li, P. L. Deng, J. M. Luo, W. Huang, Q. Chen, Z. Y. Kang, Y. J. Shen and X. L. Tian, *Appl. Catal. B Environ.*, 2022, **317**, 121796.
- [S10] W. D. He, J. P. Chen, Q. Y. Zhang, H. Cui and C. X. Wang, *Chem. Eng. J.*, 2022, **436**, 135044.
- [S11] X. Y. Jin, H. Jang, N. Jarulertwathana, M. G. Kim and S. J. Hwang, *ACS Nano*, 2022, **16**, 16452-16461.
- [S12] Y. L. Dang, T. L. Wu, H. Y. Tan, J. L. Wang, C. Cui, P. Kerns, W. Zhao, L. Posada, L. Y. Wen and S. L. Suib, *Energy Environ. Sci.*, 2021, **14**, 5433-5443.
- [S13] X. B. Bao, Y. Z. Chen, S. J. Mao, Y. Wang, Y. Yang and Y. T. Gong, *Energy Environ. Mater.*, 2022, e12418.

- [S14] Y. Zhao, X. Y. Zhang, Y. X. Gao, Z. Chen, Z. J. Li, T. Y. Ma, Z. X. Wu, L. Wang and S. H. Feng, *Small*, 2022, **18**, 2105168.
- [S15] H. Zhang, H. Su, M. A Soldatov, Y. L. Li, X. Zhao, M. H. Liu, W. L. Zhou, X. X. Zhang, X. Sun, Y. Z. Xu, P. Yao, S. Q. Wei and Q. H. Liu, *Small*, 2021, **17**, 2105231.
- [S16] Y. M. Sun, Z. Q. Xue, Q. L. Liu, Y. L. Jia, Y. L. Li, K. Liu, Y. Y. Lin, M. Liu , G. Q. Li and C. Y. Su, *Nat. Commun.*, 2021, **12**, 1369.
- [S17] W. X. Yang, W. Y. Zhang, R. Liu, F. Lv, Y. G. Chao, Z. C. Wang and S. J. Guo, *Chin. J. Catal.*, 2022, **43**, 110-115.
